# Supplementary material
Source: Research Square preprint supplement (doi:10.21203/rs.3.rs-9216396/v1)
Supplement: Supplementary file 1 [file a652106f9ee8e6ea37816dcb.pdf]

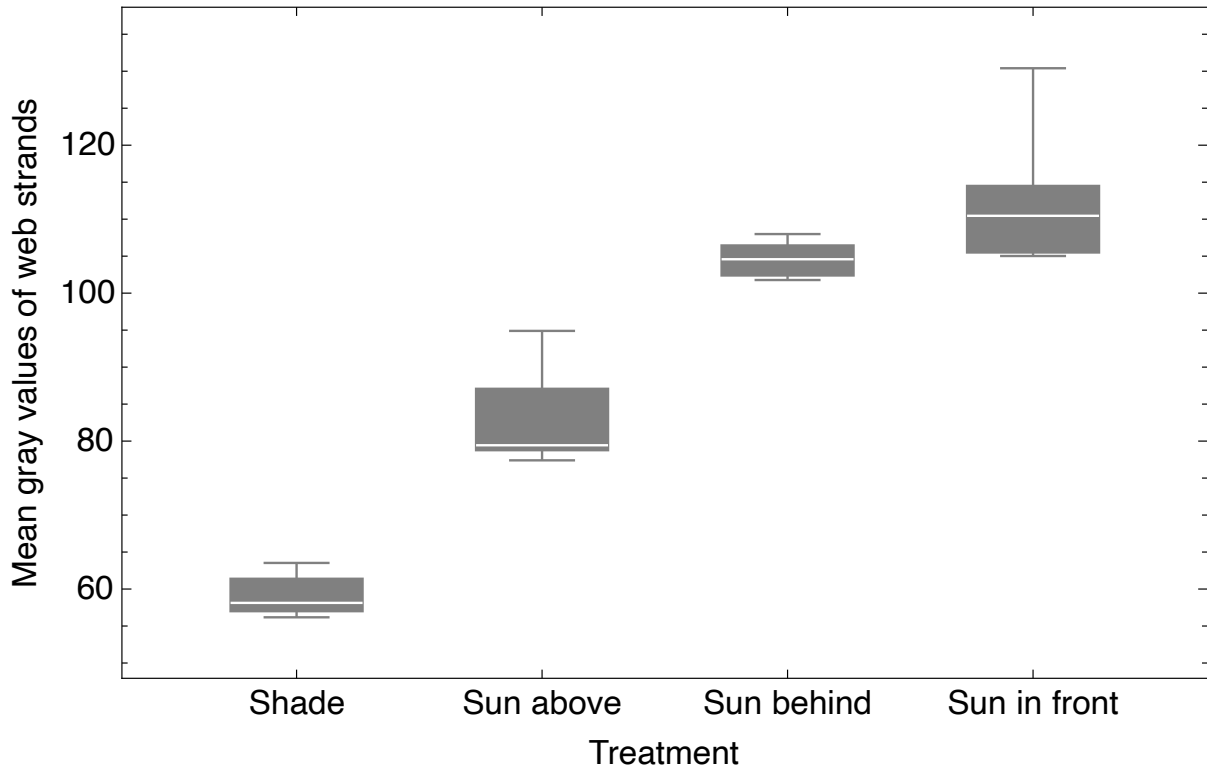

S1: Mean gray values (pixel intensities) of strands of the orb web of *Allocyclosa bifurca*, photographed under different light conditions. There was a significant difference between the treatments (ANOVA:  $F_{3, 18.7} = 559$ ,  $P < 0.001$ ).

### Post Hoc Tests

Games-Howell Post-Hoc Test – gray values

|            |                 | sunabove | sunbehind | suninfront | shade    |
|------------|-----------------|----------|-----------|------------|----------|
| sunabove   | Mean difference | —        | -22.4 *** | -30.09 *** | 23.3 *** |
|            | t-value         | —        | -11.5     | -9.75      | 11.6     |
|            | df              | —        | 11.8      | 16.4       | 12.7     |
|            | p-value         | —        | <.001     | <.001      | <.001    |
| sunbehind  | Mean difference | —        | —         | -7.69      | 45.7 *** |
|            | t-value         | —        | —         | -2.96      | 41.0     |
|            | df              | —        | —         | 10.5       | 17.6     |
|            | p-value         | —        | —         | 0.057      | <.001    |
| suninfront | Mean difference | —        | —         | —          | 53.3 *** |
|            | t-value         | —        | —         | —          | 20.2     |
|            | df              | —        | —         | —          | 11.0     |
|            | p-value         | —        | —         | —          | <.001    |
| shade      | Mean difference | —        | —         | —          | —        |
|            | t-value         | —        | —         | —          | —        |

Games-Howell Post-Hoc Test – gray values

---

|         | <b>sunabove</b> | <b>sunbehind</b> | <b>suninfront</b> | <b>shade</b> |
|---------|-----------------|------------------|-------------------|--------------|
| df      |                 |                  |                   | —            |
| p-value |                 |                  |                   | —            |

---

Note. \*  $p < .05$ , \*\*  $p < .01$ , \*\*\*  $p < .001$
